# Supplementary material for: Hugan Qingzhi tablets attenuates endoplasmic reticulum stress in nonalcoholic fatty liver disease rats by regulating PERK and ATF6 pathways
Source: PubMed Central journal article supplement (PMC10785447; doi:10.1186/s12906-024-04336-1), 2024-01-12

## Supplemental Files for:

# Hugan Qingzhi tablets attenuates endoplasmic reticulum stress in nonalcoholic fatty liver disease rats by regulating PERK and ATF6 pathways

Miaoting Yang<sup>1</sup>, Xiaorui Yao<sup>2</sup>, Fan Xia<sup>3</sup>, Shijian Xiang<sup>3</sup>, Waijiao Tang<sup>4</sup>, Benjie Zhou<sup>3\*</sup>

1. Department of Pharmacy, People's Hospital of Longhua, Shenzhen, 518109, Guangdong, China.
2. Department of Pharmacy, Shantou Central Hospital, Shantou, 515041, Guangdong, China.
3. Department of Pharmacy, the Seventh Affiliated Hospital, Sun Yat-sen University, Shenzhen, 518107, PR China
4. Zhujiang Hospital, Southern Medical University, Guangzhou, 510282, Guangdong, China.

### Address correspondence to:

Benjie Zhou: [zhoubj23@mail.sysu.edu.cn](mailto:zhoubj23@mail.sysu.edu.cn); Tel.: +86 075581206186; Fax: +86 075581206166.

ORCID ID: <https://orcid.org/0000-0001-5630-110X>

### E-mail addresses:

Miaoting Yang: [13392971213@163.com](mailto:13392971213@163.com); Xiaorui Yao: [312578497@qq.com](mailto:312578497@qq.com); Fan Xia: [xiafan@sysush.com](mailto:xiafan@sysush.com);

Shijian Xiang: [xiangshj3@mail.sysu.edu.cn](mailto:xiangshj3@mail.sysu.edu.cn) Waijiao Tang: [tangwaijiao\\_2006@126.com](mailto:tangwaijiao_2006@126.com)

**Supplementary Figure S1. The Western blot images corresponding to Fig.7a**

- GRP78-full unedited gel for Figure 7a
- GRP78-Repeat 1

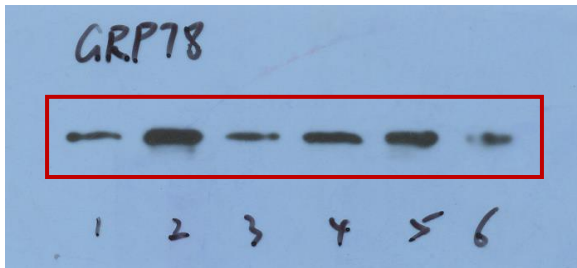

(ps: developed by film development)

GRP78-Repeat 2

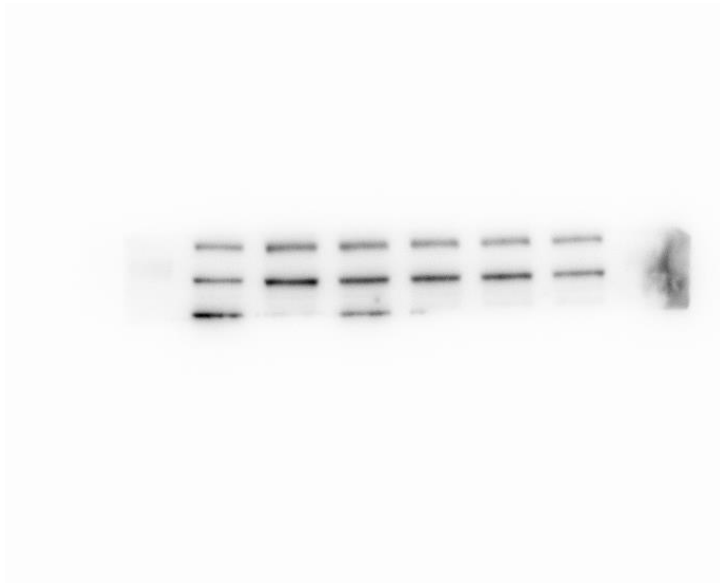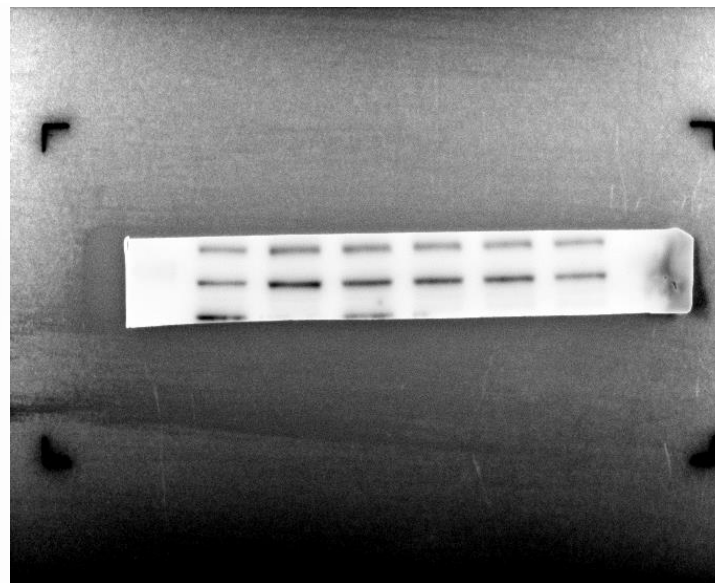

- PERK-full unedited gel for Figure 7a  
PERK-Repeat 1

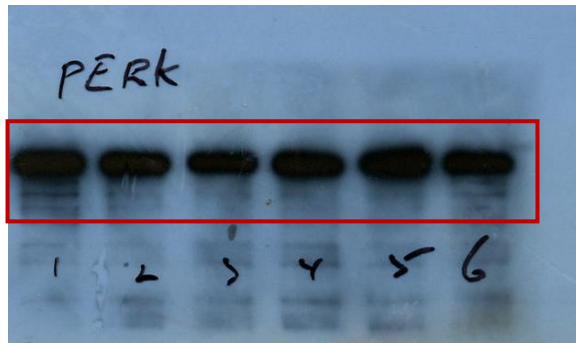

(ps: developed by film development)

PERK-Repeat 2

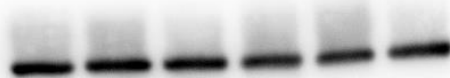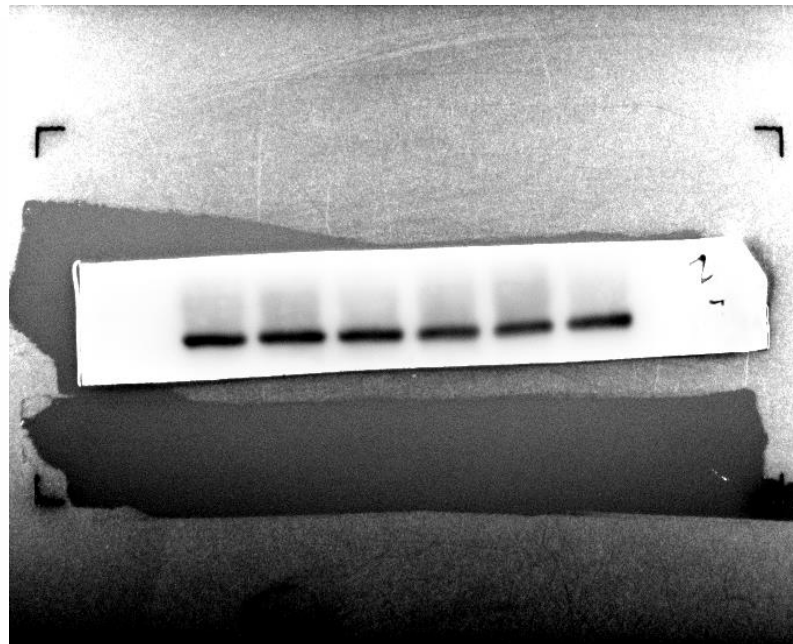

- p-PERK-full unedited gel for Figure 7a  
p-PERK-Repeat 1

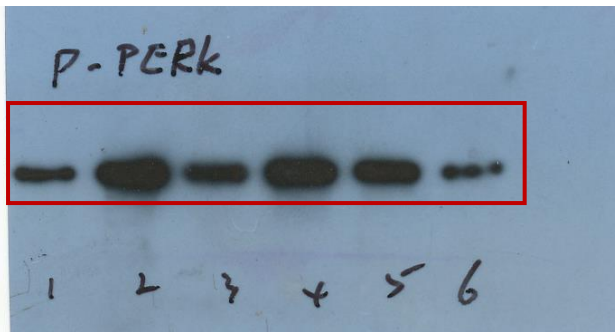

(ps: developed by film development)

p-PERK-Repeat 2

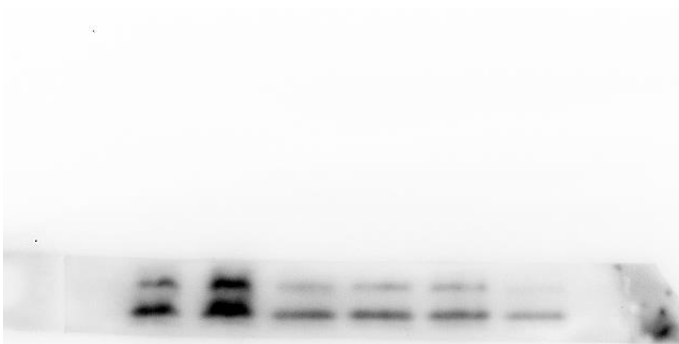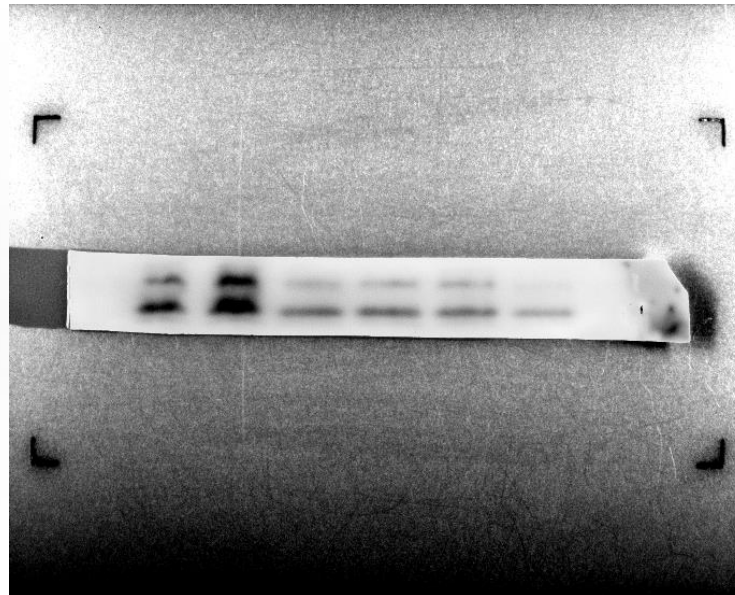

- EIF2 $\alpha$ -full unedited gel for Figure 7a  
EIF2 $\alpha$ -Repeat1

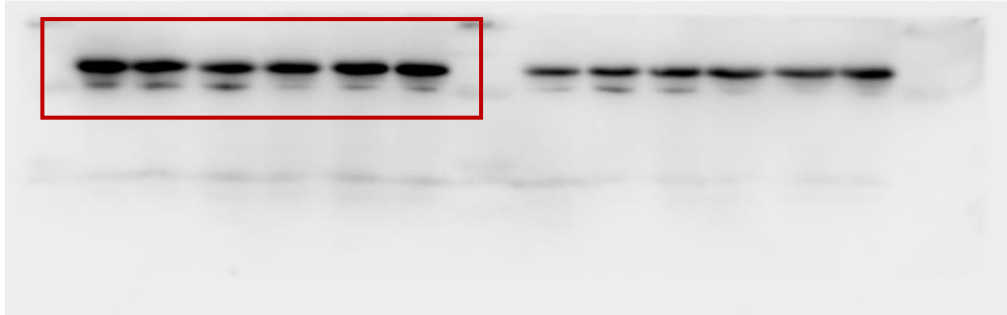

EIF2 $\alpha$ -Repeat2

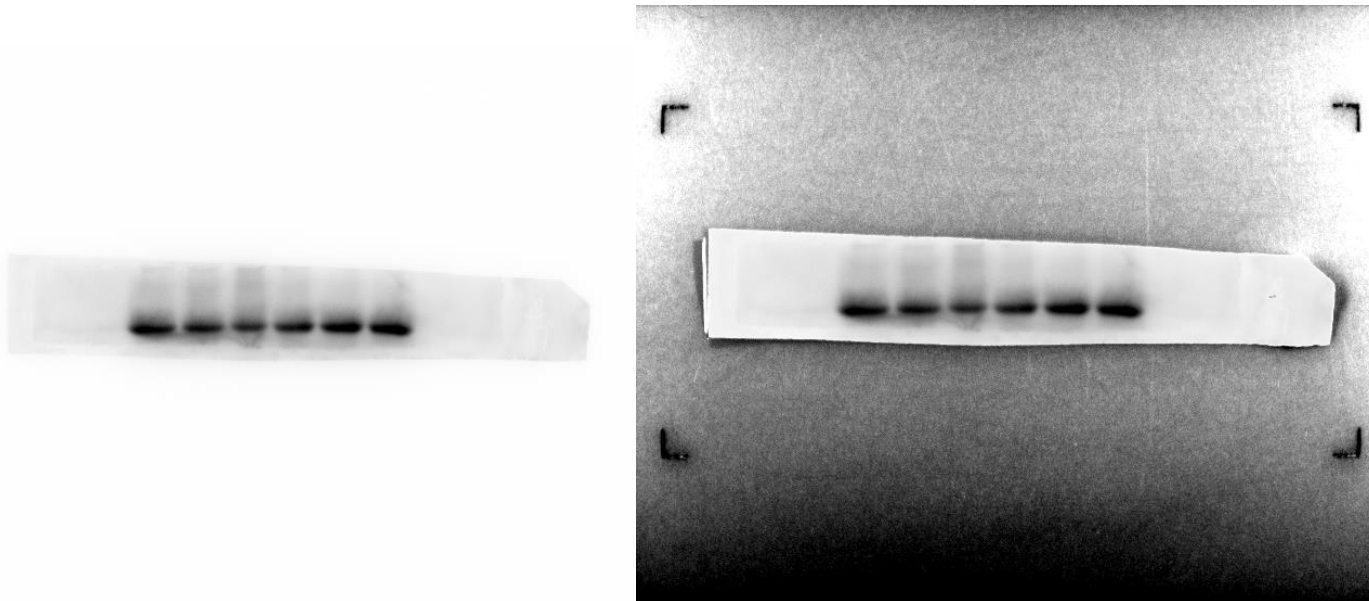

- p-EIF2 $\alpha$ -full unedited gel for Figure 7a  
p-EIF2 $\alpha$ -Repeat1

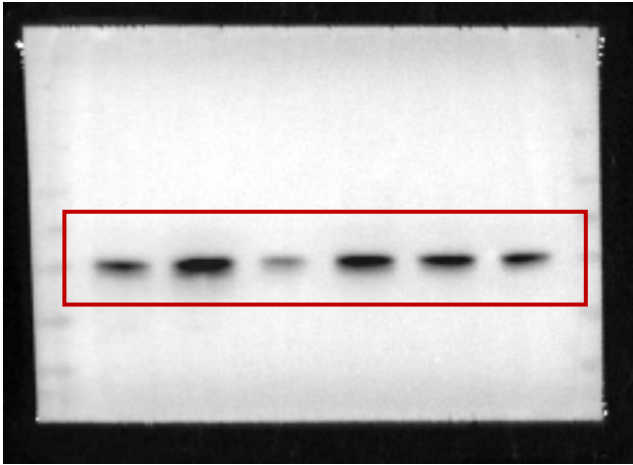

p-EIF2 $\alpha$ -Repeat2

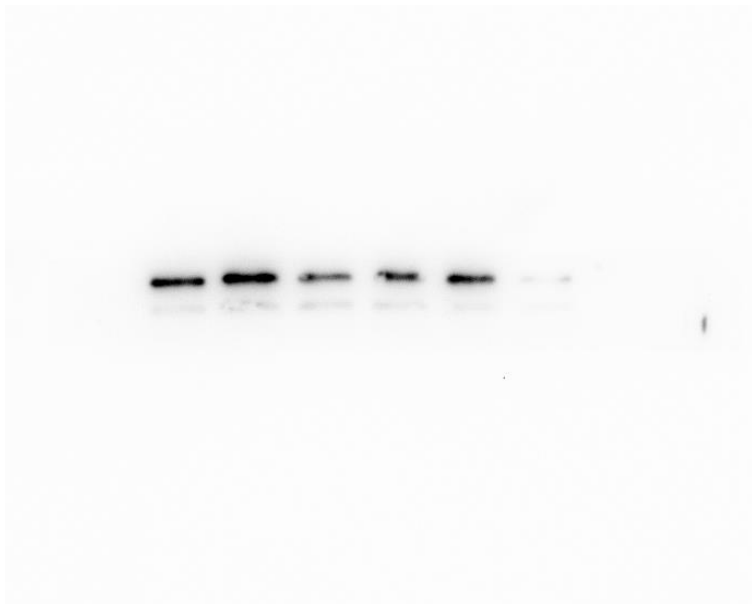

- ATF4-full unedited gel for Figure 7a

ATF4- Repeat 1

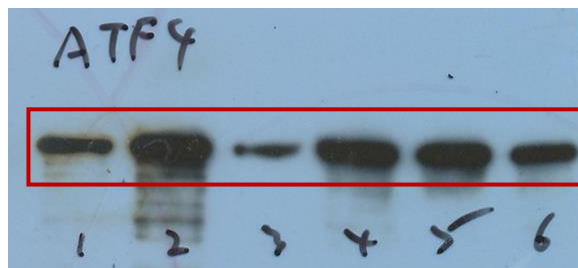

(ps: developed by film development)

ATF4- Repeat 2

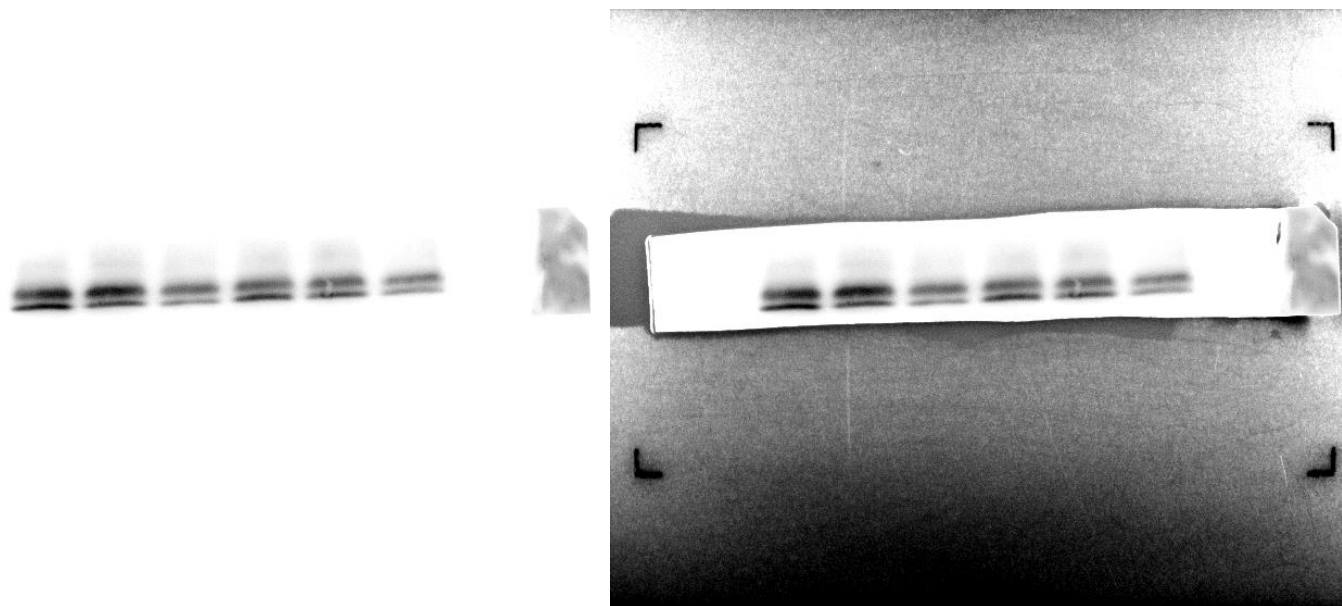

• ACC -full unedited gel for Figure 7a

ACC -Repeat 1

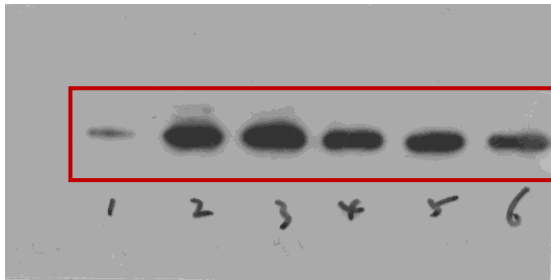

(ps: developed by film development)

ACC -Repeat 2

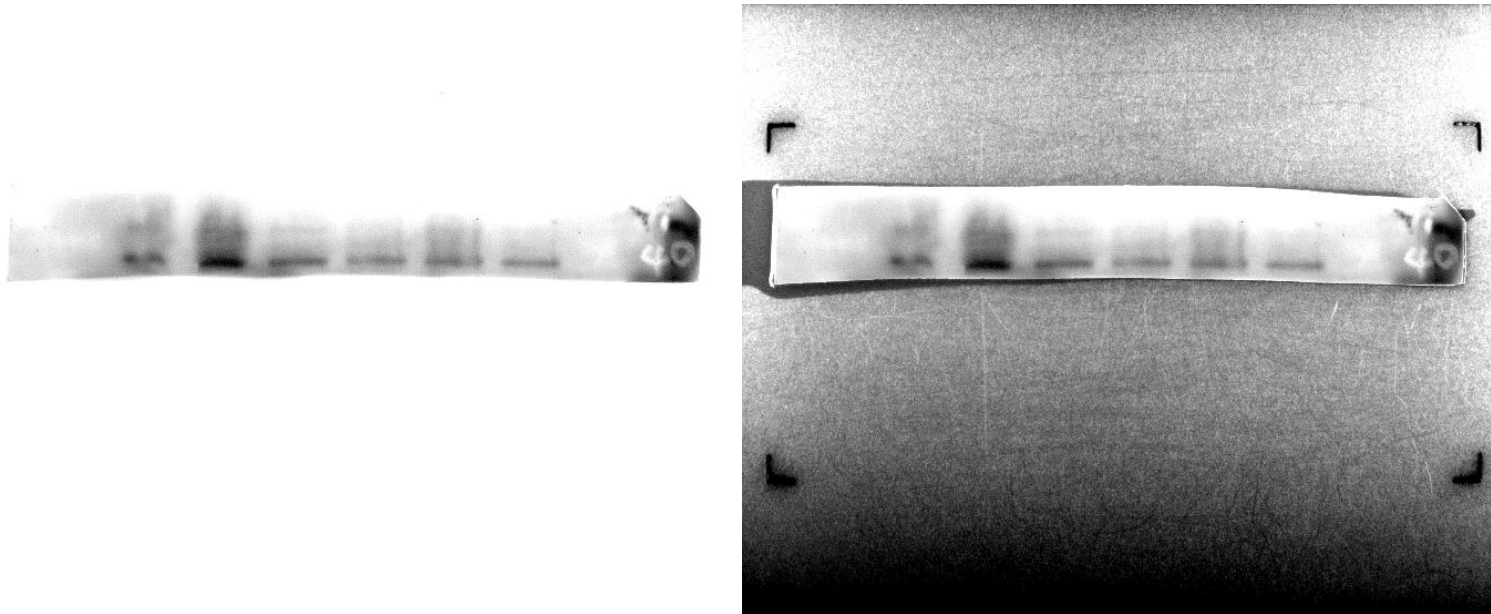



- GAPDH -full unedited gel for Figure 7a:  
GAPDH - Repeat 1

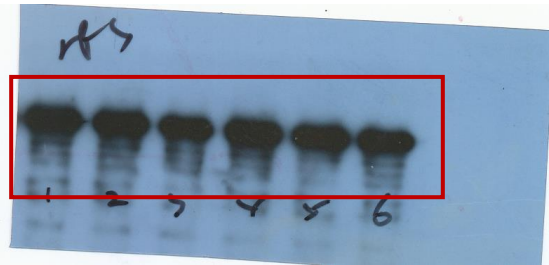

(ps: developed by film development)

GAPDH - Repeat 2

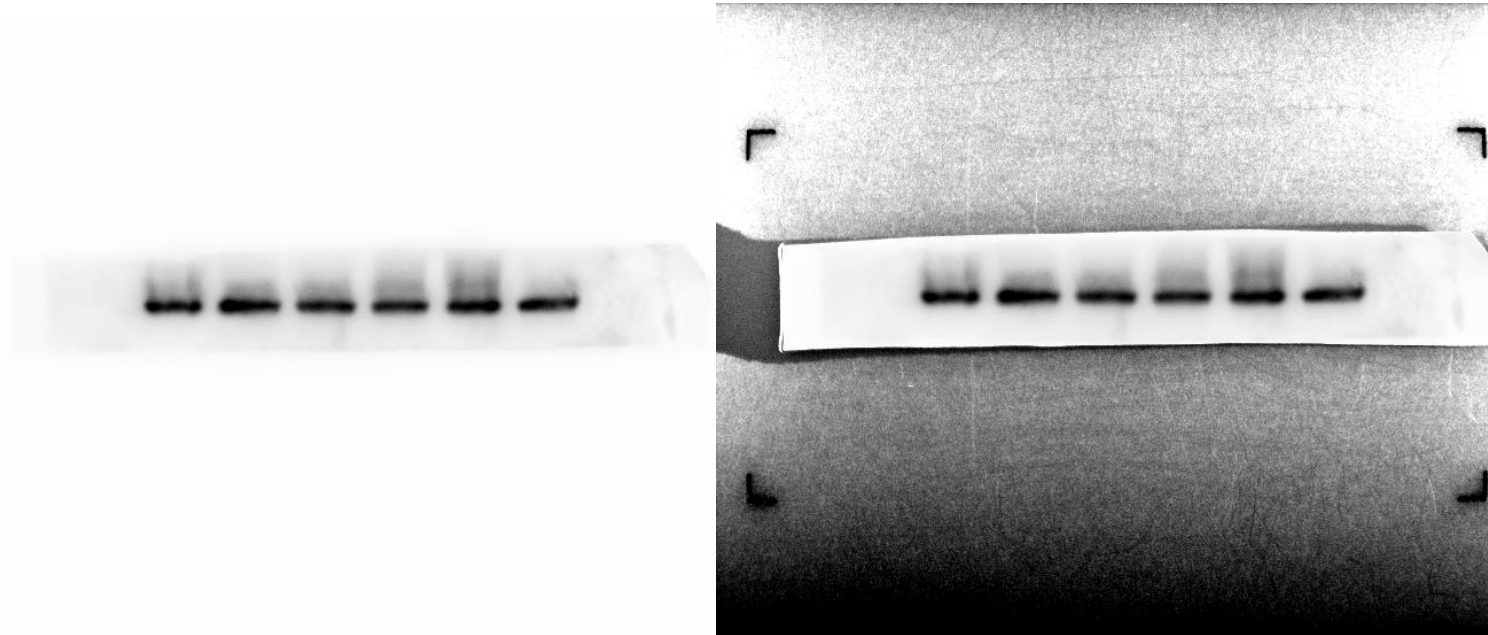

**Supplementary Figure S2. The Western blot images corresponding to Fig.8a**

- ATF6-full unedited gel for Figure 8a:  
ATF6-Repeat 1

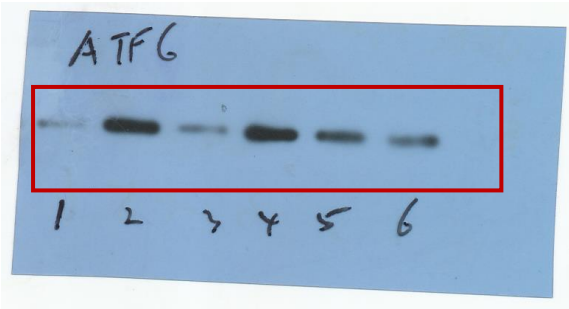

(ps: developed by film development)

**ATF6-Repeat 2**

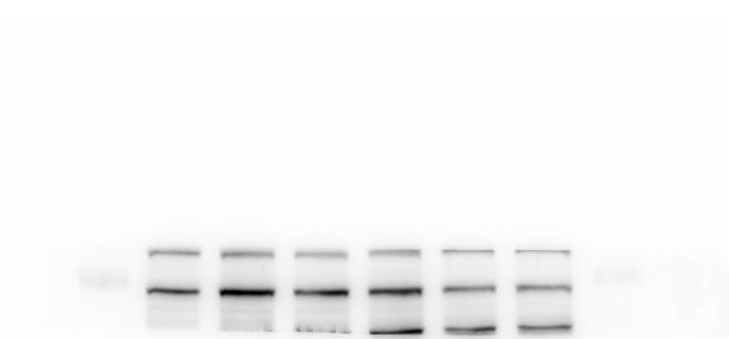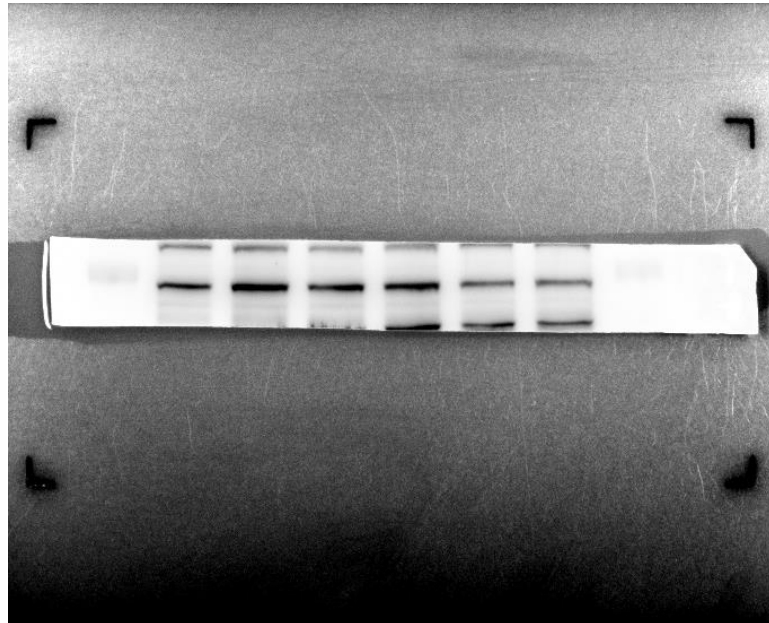

- **NF- $\kappa$ B-p65-full unedited gel for Figure 8a:**  
**NF- $\kappa$ B-p65-Repeat 1**

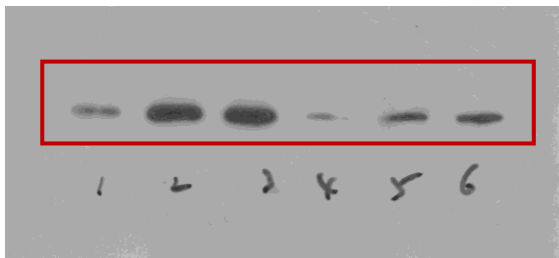

(ps: developed by film development)

**NF- $\kappa$ B-p65-Repeat 2**

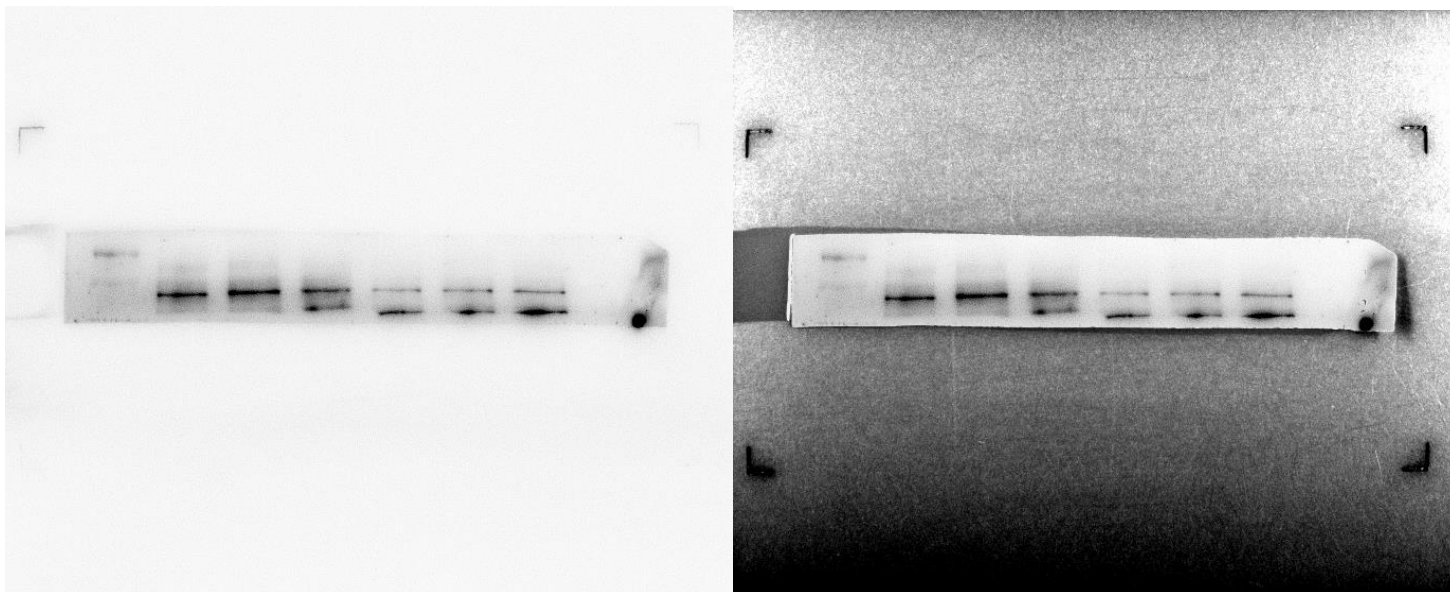

- GAPDH-full unedited gel for Figure 8a:  
GAPDH-Repeat1

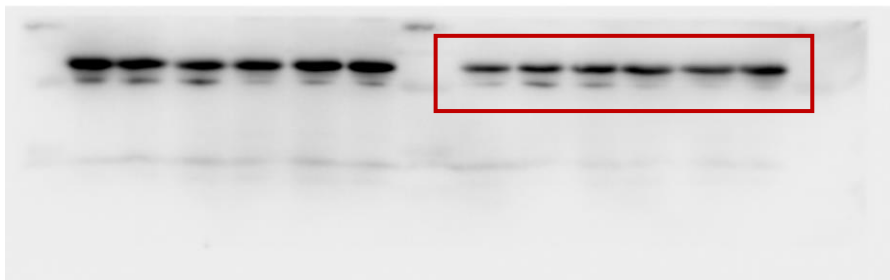

GAPDH-Repeat2

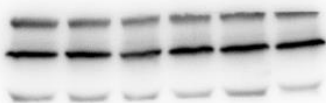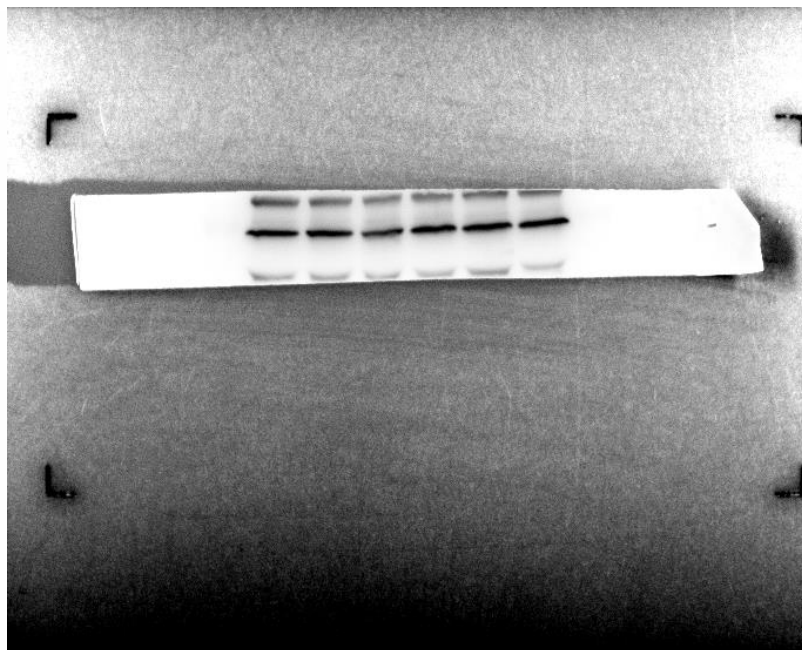

Supplement: 12906_2024_4336_MOESM1_ESM.pdf [file 12906_2024_4336_MOESM1_ESM.pdf]
